# Supplementary material for: Transcriptional regulation and chromatin architecture maintenance are decoupled functions at the Sox2 locus
Source: PubMed Central journal article supplement (PMC9296009; doi:10.1101/gad.349489.122), 2022-06-01
Supplement: supp_gad.349489.122_Supplemental_FigS2.pdf [file supp_gad.349489.122_Supplemental_FigS2.pdf]

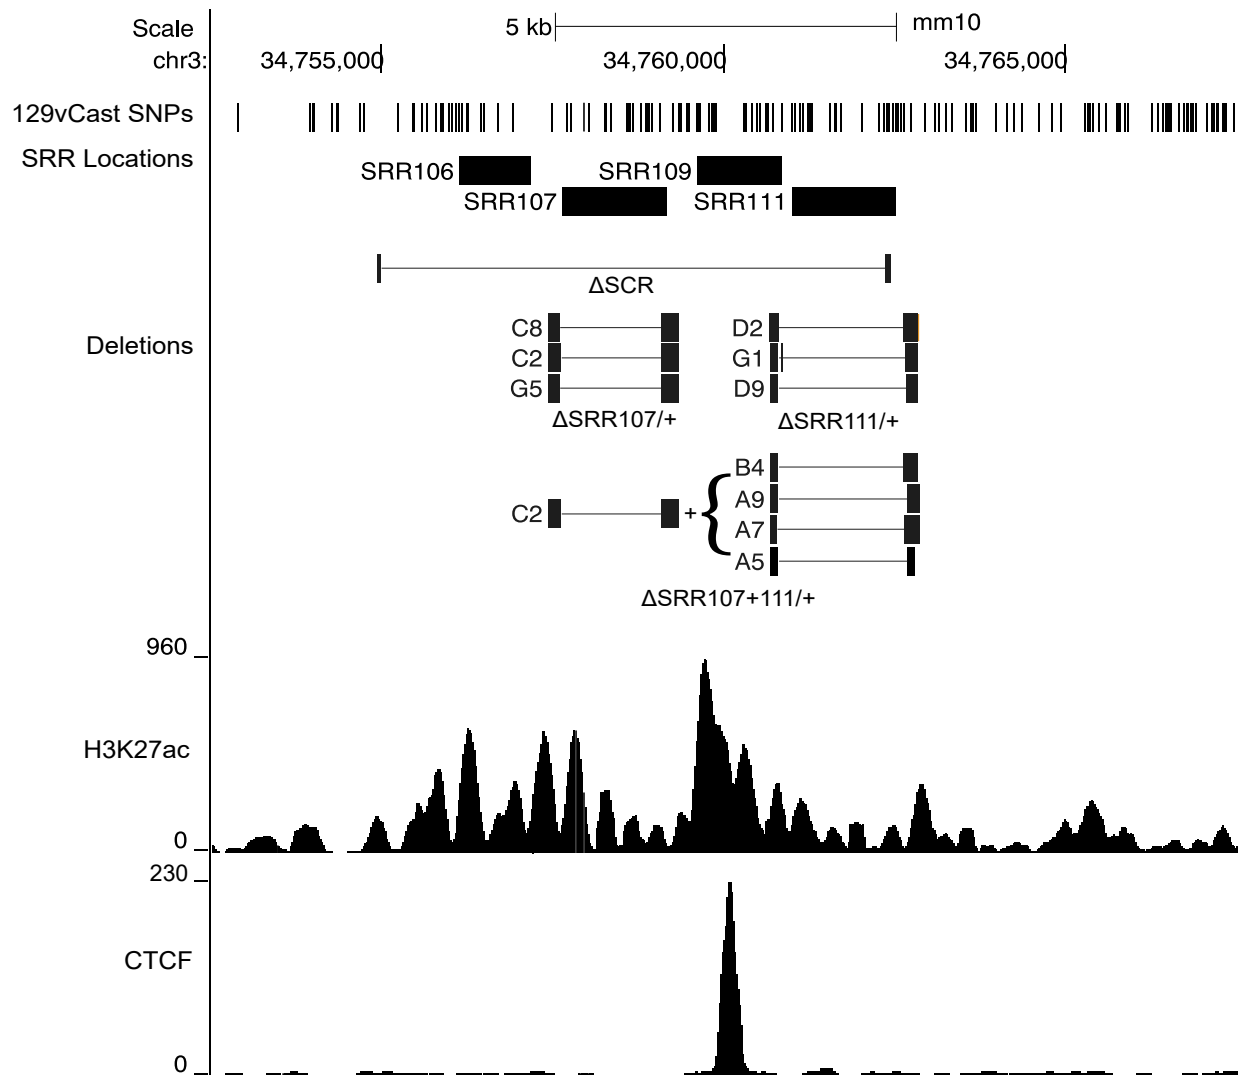

**Figure S2. Details on the generation of sub-SCR deleted cell lines targeting highly transcription factor-bound regions.** Schematic representation of SCR region along with deletion boundaries displayed on the University of California Santa Cruz (UCSC) Genome Browser (mm10). Schematics explained from top to bottom: Genome coordinates, positions of *Mus castaneus* SNPs, positions of the SCR and SRR sub regions and the sequenced clones harboring the specified deletion, ChIP-seq of H3K27ac and CTCF in wild-type mouse ESCs. For compound deletions  $\Delta$ SRR107+111/+ clones were created in the background of  $\Delta$ SRR107/+ C2. SCR deletion is shown as a comparison to the listed clones.
