# Supplementary material for: Transcriptional regulation and chromatin architecture maintenance are decoupled functions at the Sox2 locus
Source: PubMed Central journal article supplement (PMC9296009; doi:10.1101/gad.349489.122), 2022-06-01
Supplement: supp_gad.349489.122_Supplemental_FigS4.pdf [file supp_gad.349489.122_Supplemental_FigS4.pdf]

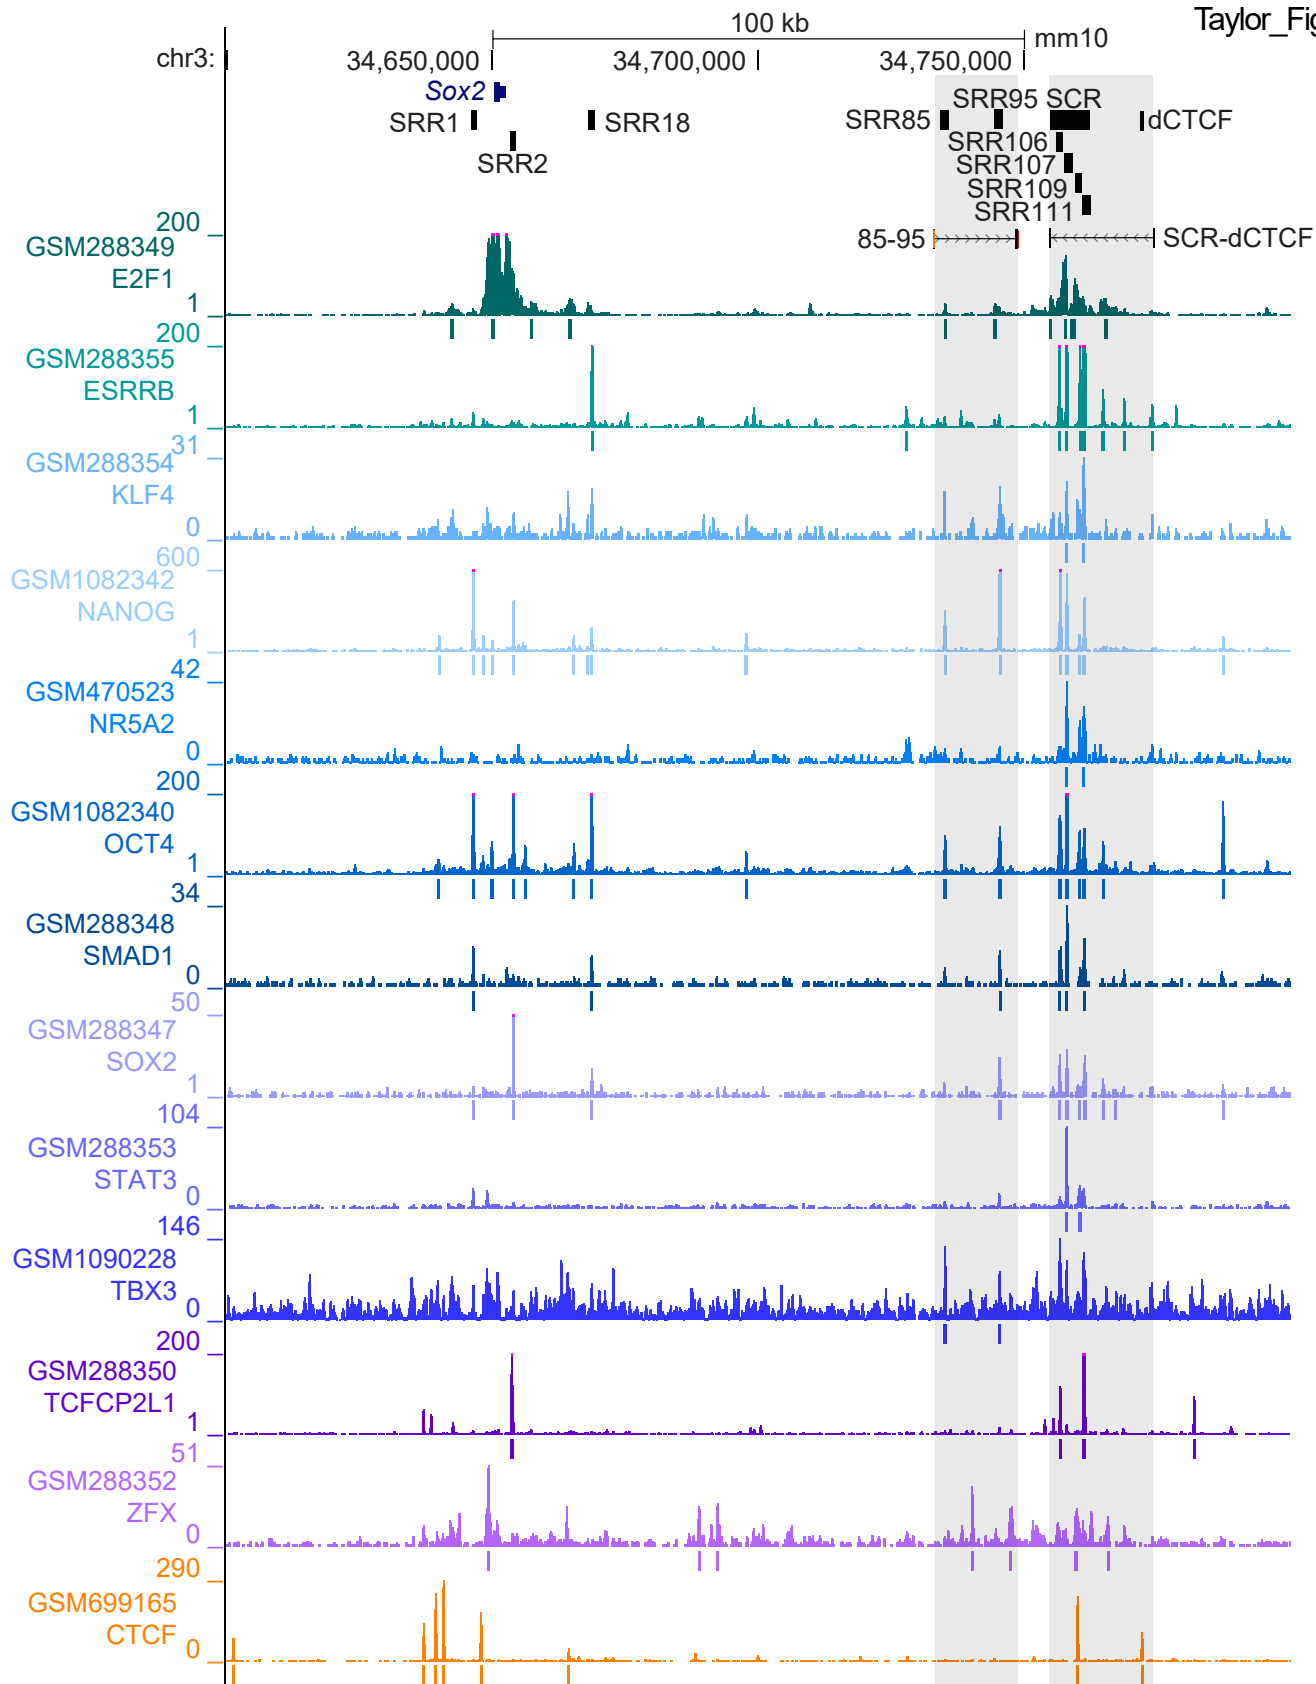

**Figure S4. Expanded view of transcription factor binding across the *Sox2* locus.** The region surrounding the *Sox2* gene is displayed on the UCSC Genome Browser (mm10). SRRs correspond to transcription factor-bound regions derived from ESC ChIP-seq datasets compiled in the CODEX database. Called ChIP-seq peaks are located and color coded beneath their requisite tracks. The region corresponding to the deletions of SRR85 to SRR95 and of SCR to the distal CTCF-bound region ( $\Delta$ SRR85-95+SCR-dCTCF/+) is highlighted in grey overlapping the sequenced deletion boundaries.
