# Supplementary material for: Transcriptional regulation and chromatin architecture maintenance are decoupled functions at the Sox2 locus
Source: PubMed Central journal article supplement (PMC9296009; doi:10.1101/gad.349489.122), 2022-06-01
Supplement: supp_gad.349489.122_Supplemental_FigS6.pdf [file supp_gad.349489.122_Supplemental_FigS6.pdf]

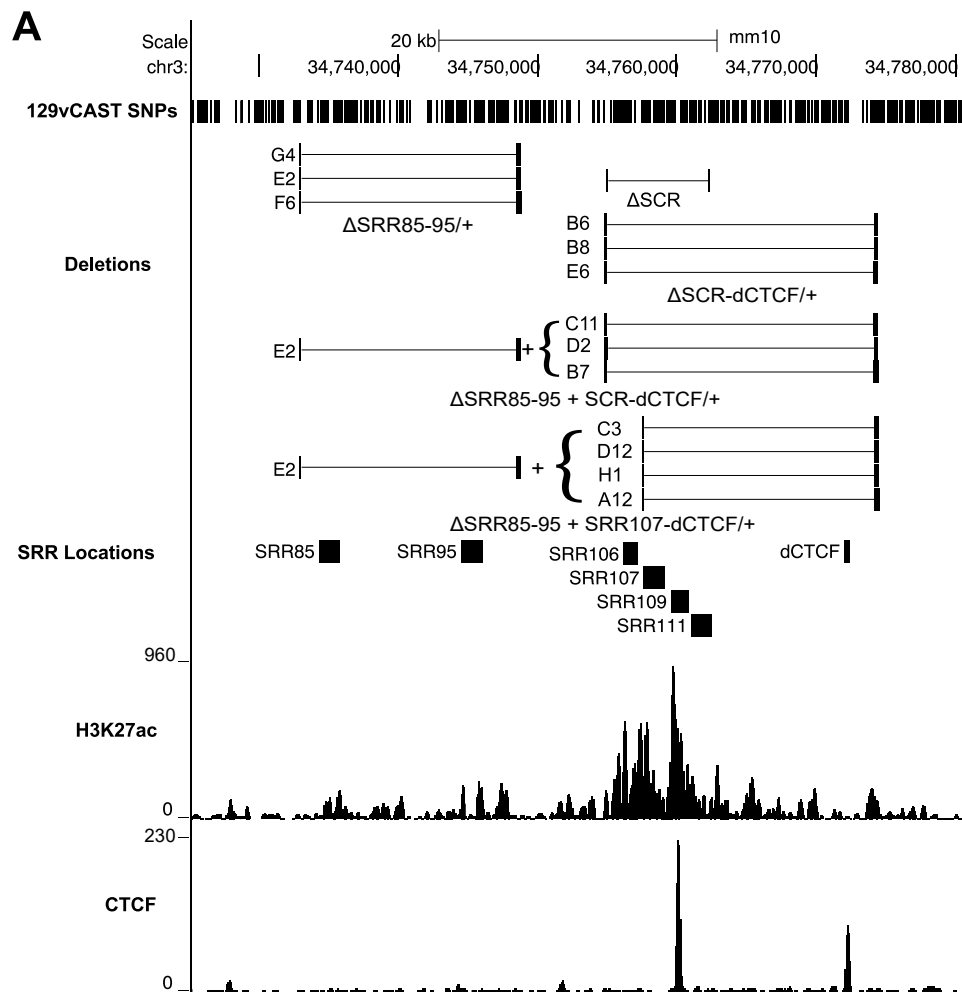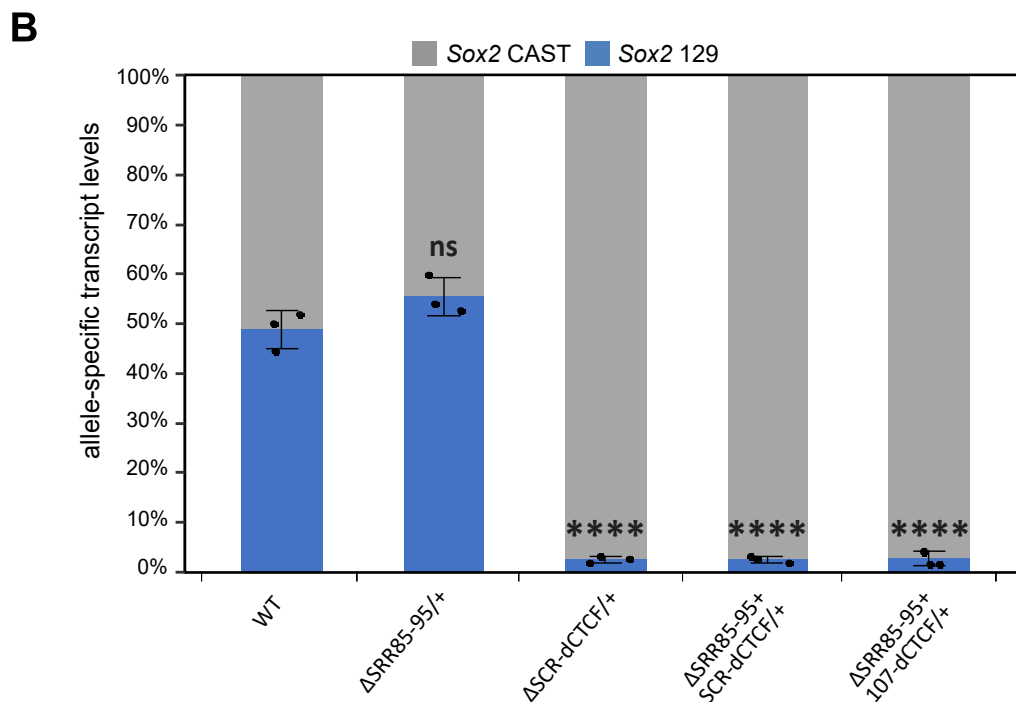

**Figure S6. Details on the generation of deletion lines including targets surrounding the SCR.** A) Schematic representation of the regions targeted for larger 129-specific deletions removing the SCR alongside a downstream CTCF-bound region displayed on the UCSC Genome Browser (mm10). Schematics explained from top to bottom: Genome coordinates, positions of *Mus castaneus* SNPs, positions of the SCR and SRR sub regions, the sequenced clones harboring the specified deletion, ChIP-seq of H3K27ac and CTCF in wild-type mouse ESCs. For compound deletions, clone  $\Delta$ SRR85-95/+ E2 was used to create  $\Delta$ SRR85-95+SCR-dCTCF/+ and  $\Delta$ SRR85-95+107-dCTCF/+. SCR deletion is shown as a comparison to the listed clones. B) *Sox2* expression in wild-type F1 cells (WT) compared to clones carrying the indicated deletion on the 129 allele. Allele-specific primers detect muscululus (129) or castaneus (CAST) RNA in RT-qPCR. Expression levels are normalized to transcript levels from GAPDH. Error bars represent the SD. Significant differences between wild-type cells and clones denoted by (\*), with adjusted p-value <0.0001 (\*\*\*\*), <0.001 (\*\*\*), <0.01 (\*\*), <0.05 (\*) or non-significant (n.s.).
