# Supplementary material for: Transcriptional regulation and chromatin architecture maintenance are decoupled functions at the Sox2 locus
Source: PubMed Central journal article supplement (PMC9296009; doi:10.1101/gad.349489.122), 2022-06-01
Supplement: supp_gad.349489.122_Supplemental_FigS8.pdf [file supp_gad.349489.122_Supplemental_FigS8.pdf]

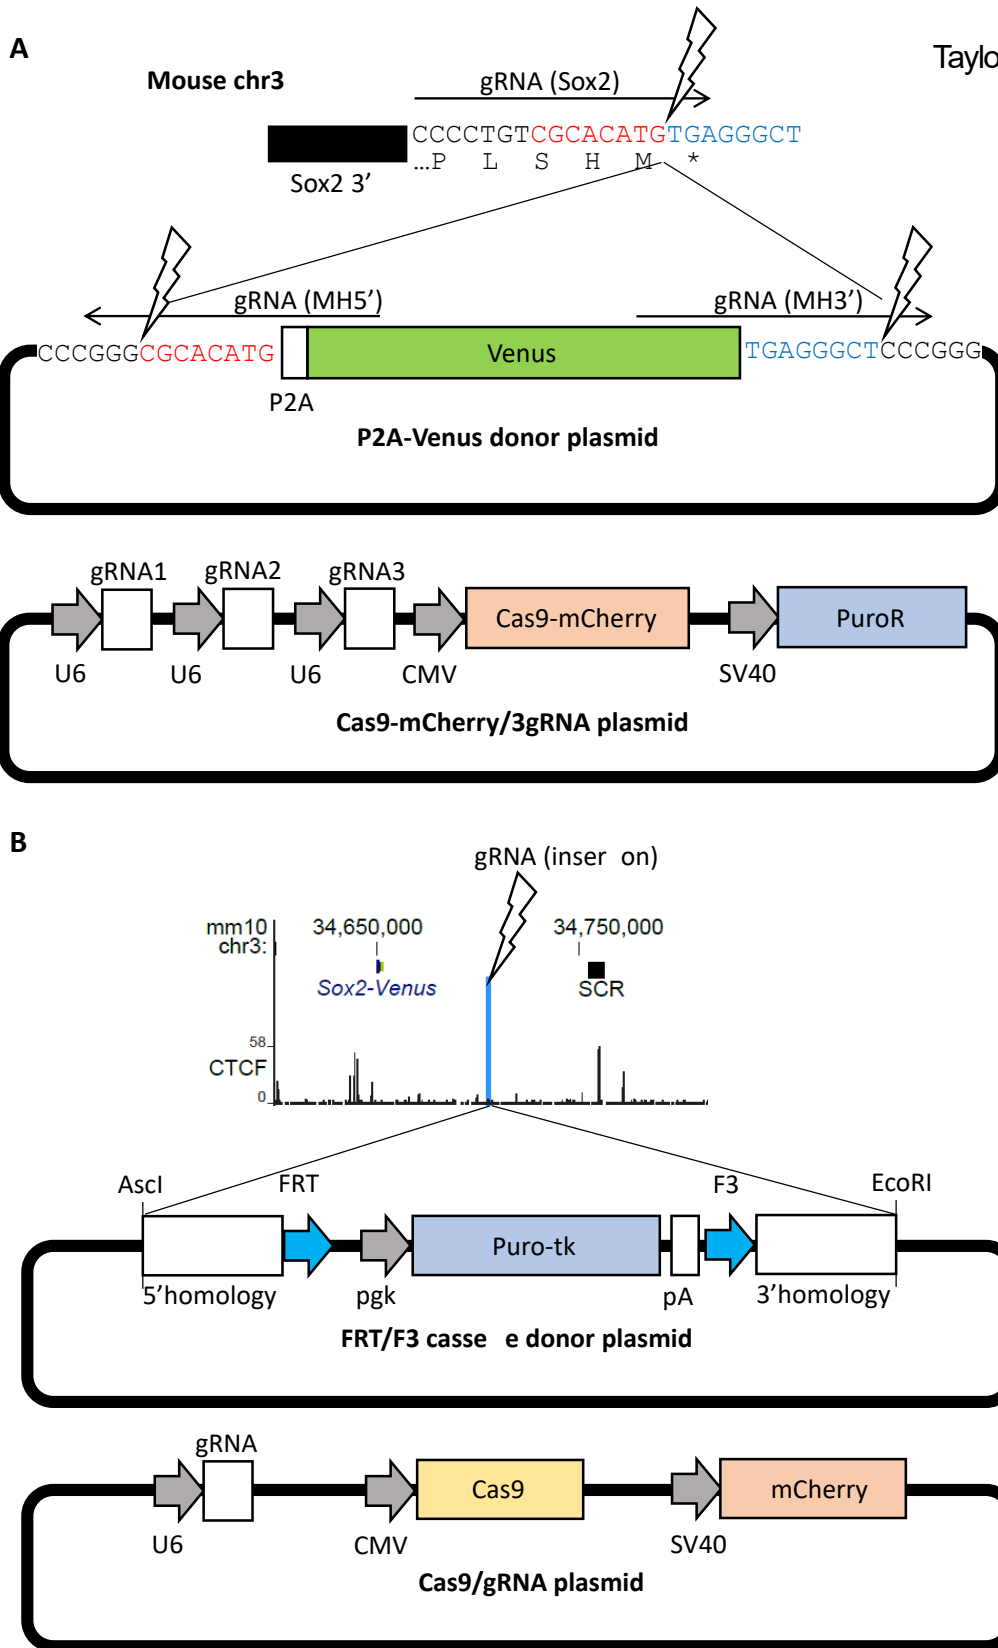

**Figure S8. Construction of Sox2 insertion lines.** A) Plasmids constructed to generate the Venus tag at the 3' end of Sox2. F1 ESCs are transfected with a plasmid containing the P2A-Venus cassette (middle) and a plasmid (bottom) with Cas9-mCherry, a puromycin resistance marker and expression constructs for three gRNAs: Sox2, which targets CRISPR/Cas9 to the 3' end of the Sox2 coding sequence (top), and MH5' and MH3', which target CRISPR/Cas9 to the termini of the P2A-Venus cassette to generate 8 bp microhomology arms. B) Insertion of the recombinase-mediated cassette exchange construct. The Sox2-Venus<sup>±</sup> line is transfected with two plasmids: one (middle) containing an FRT-puro-tk-F3 cassette for positive-negative selection, flanked by homology arms for the Sox2 intervening sequence, and one (bottom) containing Cas9, mCherry and a construct for expression of one gRNA, which targets CRISPR/Cas9 to a musculus site located between Sox2 and the SCR (top).
